# Supplementary material for: Cryo-electron microscopy reveals two distinct type IV pili assembled by the same bacterium
Source: Nat Commun. 2020 May 6;11:2231. doi: 10.1038/s41467-020-15650-w (PMC7203116; doi:10.1038/s41467-020-15650-w)
Supplement: Supplementary file 4 — Source Data [file 41467_2020_15650_MOESM4_ESM.xlsx]

## Sheet: Fig. 5c-d
	Fig. 5c
			Coomassie (left half of gel used for figure, coloured using GIMP)								Glycoprotein stain (left half of gel used for final figure)
	Fig.5d
			Coomassie (coloured using GIMP)									Licor 800 nm Channel (Lectins)							Licor 800 nm Channel (Lectins)
											Lectins used:							Lectins used:
											1: UEA1 (mirrored)							1: RCA120 (mirrored, not in final figure)
											2: WGA							2: PNA (not in final figure)
											3: ConA							3: DBA
											4: SBA
												Licor 600 nm Channel (used for marker bands only)							Licor 600 nm Channel (used for marker bands only)

## Sheet: Fig. 5e
	Fig. 5e
															diagnostic ions in green
	Pili-OHy
	UHPLC Peak Id	Average		Proposed structure	LC-ESI-MS										LC-ESI-MS /MS
		GU	% Area		Composition						[M/Z]+ calculated	[M/Z]2+ calculated	[M/Z]+ registered	[M/Z]2+ registered	[M/Z] characteristic fragment ions (composition)
					Hex (H)	HexNAc (N)	Pse2 (W)	O-Ac	X	Y					Y ions	B ions
	1	1.71	7.69	* W-H-PROC	1	0	1	0	0	0	714.39	357.2	714.38	nd	714.38 (H1W1-PROC)
	2	1.8	1.02	W-H-(Ac1)N-PROC	1	1	1	1	0	0	959.59	479.8	959.46	480.23	483.36 (N1Ac1-PROC)	315.16 (W1)
															645.44 (H1N1Ac1-PROC)	477.25 (H1W1)
	3	1.84	0.65	(Ac1)W-H-N-PROC	1	1	1	1	0	0	959.59	479.8	959.47	480.24	441.36 (N1-PROC)	315.10 (W1)
															603.44 (H1N1-PROC)	357.19 (W1Ac1)
																519.27 (H1W1Ac1)
	4	1.95	1.16	W-(Ac1)H-N-PROC	1	1	1	1	0	0	959.59	479.8	959.45	480.23	441.37 (N1-PROC)	315.15 (W1)
															645.44 (H1N1Ac1-PROC)	519.28 (H1W1Ac1)
	5	2.05	0.64	W-H-(Ac1)N-(Ac1)N-PROC	1	2	1	2	0	0	1204.58	602.29	1204.55	602.28	483.46 (N1Ac1-PROC)
															728.45 (N2Ac2-PROC)
															890.40 (H1N2Ac2-PROC)
	6	2.31	0.54	?	-	-	-	-	-	-	*	*	1175.56	588.28
	7	2.36	0.27	W-H-N-PROC	1	1	1	0	0	0	917.47	458.74	917.46	459.23	441.34 (N1-PROC)	315.18 (W1)
															603.40 (H1N1-PROC)	477.25 (H1W1)
	8	2.42	10.6	W-H-N-PROC	1	1	1	0	0	0	917.47	458.74	917.43	459.22	441.31 (N1-PROC)	315.21 (W1)
															603.45 (H1N1-PROC)	477.22 (H1W1)
	9	2.48	2.45	W-H-N-(Ac1)N-PROC	1	2	1	1	0	0	1162.57	581.29	1162.54	581.77	483.40 (N1Ac1-PROC)
															686.45 (N2Ac1-PROC)
															848.58 (H1N2Ac1-PROC)
	10	2.55	1.54	Ac1(X-H-N)-PROC	1	1	0	1	1	0	*	*	990.45	495.73	441.37 (N1-PROC)	346.13 (X1)
															603.38 (H1N1-PROC)	550.29 (H1X1Ac1)
	11	2.57	1.89	(Ac1)W-H-N-N-PROC	1	2	1	1	0	0	1162.57	581.29	1162.53	581.77	441.35 (N1-PROC)	357.05 (W1Ac1)
															644.44 (N2-PROC)	519.29 (H1W1Ac1)
															686.38 (N2Ac1-PROC)
															848.25 (H1N2Ac1-PROC)
				Ac1(X-H-N)-PROC	1	1	0	1	1	0	*	*	990.45	495.72	441.34 (N1-PROC)	346.18 (X1)
															645.38 (H1N1Ac1-PROC)	550.20 (H1X1Ac1)
	12	2.65	8.24	* X-H-PROC	1	0	0	0	1	0	*	*	745.48	nd	745.48 (H1X1-PROC)
	13	2.71	1.35	W-H-(Ac1)N-N-PROC	1	2	1	1	0	0	1162.57	581.29	1162.55	581.78	441.34 (N1-PROC)	519.20 (H1W1Ac1)
															644.43 (N2-PROC)
															686.64 (N2Ac1-PROC)
															848.48 (H1N2Ac1-PROC)
	14	2.79	0.79	Ac1(X-H-N)-PROC	1	1	0	0	1	0	*	*	990.45	495.72	441.24 (N1-PROC)	346.19 (X1)
															645.38 (H1N1Ac1-PROC)	550.34 (H1X1Ac1)
	15	2.86	0.44	Y-H-N-PROC	1	1	0	0	0	1	*	*	932.46	466.73	441.39 (N1-PROC)	330.17 (Y1)
															603.42 (H1N1-PROC)	492.25 (H1Y1)
				(Ac1)X-H-(Ac1)N-N-PROC	1	2	0	2	1	0	*	*	1235.56	618.28	441.33 (N1-PROC)	346.00 (X1)
															644.42 (N2-PROC)	388.38 (X1Ac1)
															686.63 (N2Ac1-PROC)
															848.44 (H1N2Ac1-PROC)
															890.50 (H1N2Ac2-PROC)
	16	2.9	0.48	?							*	*	1133.53	567.27
	17	2.94	0.24	W-H-(Ac1)N-PROC	1	1	1	1	0	0	959.48	479.74	959.42	480.16	483.38 (N1Ac1-PROC)	315.17 (W1)
																477.26 (H1W1)
																680.35 (H1N1W1)
	18	3.05	2.48	W-H-N-PROC	1	1	1	0	0	0	917.47	458.74	918.42	459.73	441.33 (N1-PROC)	316.17 (W1)
															603.35 (H1N1-PROC)	478.22 (H1W1)
				X-H-N-(Ac1)N-PROC	1	2	0	1	1	0	*	*	1193.55	597.29	483.39 (N1Ac1-PROC)	346.13 (X1)
															686.43 (N2Ac1-PROC)
															848.52 (H1N2Ac1-PROC)
	19	3.11	21.51	W-H-N-N-PROC	1	2	1	0	0	0	1120.56	560.28	1120.53	560.77	441.35 (N1-PROC)	315.25 (W1)
															644.45 (N2-PROC)	477.25 (H1W1)
															806.63 (H1N2-PROC)	680.39 (H1N1W1)
	20	3.17	12.11	X-H-N-PROC	1	1	0	0	1	0	*	*	948.43	474.73	441.37 (N1-PROC)	346.16 (X1)
															603.39 (H1N1-PROC)	508.28 (H1X1)
	21	3.24	1.13	X-H-(Ac1)N-N-PROC	1	2	0	1	1	0	nd	nd	1193.59	597.27	441.36 (N1-PROC)	346.23 (X1)
															644.50 (N2-PROC)	508.38 (H1X1)
															686.47 (N2Ac1-PROC)
															848.55 (H1N2Ac1-PROC)
	22	3.32	0.61	?	-	-	-	-	-	-	*	*	1064.51	532.76
				W-H-(H)N-PROC	2	1	1	0	0	0	1079.53	539.77	1079.52	nd	441.13 (N1-PROC)	315.14 (W1)
															603.42 (H1N1-PROC)	477.28 (H1W1)
															765.43 (H2N1-PROC)	680.39 (H1N1W1)
	23	3.44	1.08	X-H-(Ac1)N-N-PROC	1	2	0	1	1	0	*	*	1193.59	597.27	441.36 (N1-PROC)	346.22 (X1)
															644.44 (N2-PROC)	508.13 (H1X1)
															686.43 (N2Ac1-PROC)
															848.65 (H1N2Ac1-PROC)
				W-H-(Ac1)N-PROC	1	1	1	1	0	0	959.48	479.74	959.45	nd	441.38 (N1-PROC)	316.04 (W1)
															483.41 (N1Ac1-PROC)	477.23 (H1W1)
															645.38 (H1N1Ac1-PROC)	680.41 (H1N1W1)
	24	3.49	0.23	?	-	-	-	-	-	-	*	*	1135.53	568.27
	25	3.67	0.56	W-H-N-N-PROC	1	2	1	0	0	0	1120.56	560.28	1120.53	560.77	441.33 (N1-PROC)
															644.43 (N2-PROC)
															806.38 (H1N2-PROC)
	26	3.74	0.2	X-H-N-N-PROC	1	2	0	0	1	0	*	*	1151.55	576.27	441.37 (N1-PROC)	346.23 (X1)
															644.47 (N2-PROC)	508.13 (H1X1)
															806.52 (H1N2-PROC)	711.63 (H1N1X1)
	27	3.78	19.01	X-H-N-N-PROC	1	2	0	0	1	0	*	*	1151.52	575.76	441.36 (N1-PROC)	346.12 (X1)
															644.45 (N2-PROC)	508.30 (H1X1)
															806.49 (H1N2-PROC)	711.38 (H1N1X1)
	28	3.84	0.51	X-H-N-N-PROC	1	2	0	0	1	0	*	*	1551.58	576.26	441.40 (N1-PROC)	346.00 (X1)
															644.43 (N2-PROC)	508.13 (H1X1)
															806.45 (H1N2-PROC)	711.35 (H1N1X1)
	29	3.91	0.3	X-H-(H)N-PROC	2	1	0	0	1	0	*	*	1110.53	555.75	441.38 (N1-PROC)	346.15 (X1)
															603.40 (H1N1-PROC)	508.25 (H1X1)
															765.54 (H2N1-PROC)	711.25 (H1N1X1)
	30	3.98	0.3	X-H-N-N-PROC	1	2	0	0	1	0	*	*	1149.52	575.25	441.24 (N1-PROC)	346.16 (X1)
															644.50 (N2-PROC)	508.23 (H1X1)
															805.50 (H1N2-PROC)	711.33 (H1N1X1)
																914.37 (H1N2X1)

## Sheet: Fig.6a
	Supplementary Fig. 6a
			twitching plate 68c									twitching plate 55c (1)									twitching plate 55c (2)
			(12 cm wide)									(12 cm wide)									(8cm diameter)
			wild type 68°C : 2nd row, middle									wild type 55°C: 4th row, middle									pilA5::kat 55°C: left
			pilA4::kat 68°C: 4th row, left									pilA4::kat 55°C: 1st row, right
			pilA5::kat 68°C: 4 th row, middle

## Sheet: Fig.6b
	Supplementary Fig.6b
	Experiment 1
		68c
			+ streptomycin (e.g. no of transformants); dilutions						- streptomycin (e.g. number viable colonies); dilutions
		Strain	1 to 10	scaled	1 to 100	scaled	1 to 1000	scaled	1 to 100000	scaled	1 to 10000	scaled	1 to 1000	scaled
		wt	1067	10670	183	18300	26	26000	34	3400000	138	1380000	1294	1294000
		delta 1836	902	9020	134	13400	14	14000	21	2100000	124	1240000	1027	1027000
		delta PilA4	0	0	0	0	0	0	29	2900000	128	1280000	1164	1164000
		no DNA	0	0	0	0	0	0	49	4900000	274	2740000	1262	1262000
			+ streptomycin		- streptomycin
		Strain	average	st err mean	average	st err mean	% efficiency
		wt	18323.3	4425.41	2.02467e+06	688115	0.905005
		delta 1836	12140	1569.59	1.45567e+06	327982	0.833982
		delta PilA4	0	0	1.78133e+06	560335	0
		no DNA	0	0	2.96733e+06	1.05633e+06	0
	Experiment 2
		68c
			+ streptomycin (e.g. no of transformants); dilutions						- streptomycin (e.g. number viable colonies); dilutions
		Strain	1 to 10	scaled	1 to 100	scaled	1 to 1000	scaled	1 to 100000	scaled	1 to 10000	scaled	1 to 1000	scaled
		wt	1093	10930	161	16100	27	27000	29	2900000	204	2040000	1096	1096000
		delta 1836	919	9190	126	12600	19	19000	19	1900000	160	1600000	1148	1148000
		delta PilA4	0	0	0	0	0	0	11	1100000	168	1680000	822	822000
		no DNA	0	0	0	0	0	0	34	3400000	254	2540000	1428	1428000
			+ streptomycin		- streptomycin
		Strain	average	st err mean	average	st err mean	% efficiency
		wt	18010	4736.29	2012000	520958	0.895129
		delta 1836	13596.7	2875.41	1.54933e+06	218557	0.877582
		delta PilA4	0	0	1.20067e+06	252746	0
		no DNA	0	0	2456000	570815	0
	Experiment 3
		68c
			+ streptomycin (e.g. no of transformants); dilutions						- streptomycin (e.g. number viable colonies); dilutions
		Strain	1 to 10	scaled	1 to 100	scaled	1 to 1000	scaled	1 to 100000	scaled	1 to 10000	scaled	1 to 1000	scaled
		wt	1544	15440	212	21200	13	13000	25	2500000	187	1870000	818	818000
		delta 1836	1052	10520	108	10800	12	12000	24	2400000	138	1380000	526	526000
		delta PilA4	0	0	0	0	0	0	12	1200000	125	1250000	537	537000
		no DNA	0	0	0	0	0	0	38	3800000	264	2640000	1262	1262000
			+ streptomycin		- streptomycin
		Strain	average	st err mean	average	st err mean	% efficiency
		wt	16546.7	2430.95	1.72933e+06	490619	0.956823
		delta 1836	11106.7	453.921	1.43533e+06	541684	0.773804
		delta PilA4	0	0	995667	229787	0
		no DNA	0	0	2.56733e+06	733558	0
	Experiment 4
		68c
			+ streptomycin (e.g. no of transformants); dilutions						- streptomycin (e.g. number viable colonies); dilutions
		Strain	1 to 10	scaled	1 to 100	scaled	1 to 1000	scaled	1 to 100000	scaled	1 to 10000	scaled	1 to 1000	scaled
		wt	1178	11780	166	16600	32	32000	45	4500000	198	1980000	916	916000
		delta 1836	934	9340	142	14200	21	21000	34	3400000	180	1800000	828	828000
		delta PilA4	0	0	0	0	0	0	22	2200000	156	1560000	904	904000
		no DNA	0	0	0	0	0	0	57	5700000	207	2070000	973	973000
			+ streptomycin		- streptomycin
		Strain	average	st err mean	average	st err mean	% efficiency
		wt	20126.7	6097.54	2.46533e+06	1.06269e+06	0.816387
		delta 1836	14846.7	3381.45	2.00933e+06	749814	0.738885
		delta PilA4	0	0	1.55467e+06	374132	0
		no DNA	0	0	2.91433e+06	1.42838e+06	0
		ALL DATA
		Strain	Exp1 (% eff)	Exp2 (% eff)	Exp3 (% eff)	Exp4 (% eff)	Av. Efficiency (%)	st err mean
		Wt	0.905005	0.895129	0.956823	0.816387	0.893336	0.0289988
		delta 1836	0.833982	0.877582	0.773804	0.738885	0.806063	0.0308868
		delta PilA4	0	0	0	0	0	0
		no DNA	0	0	0	0	0	0
		For figure
			Av.Efficiency (%)	st err mean
		wt	0.893336	0.0289988
		pilA4::kat	0	0
		pilA5::kat	0.806063	0.0308868
		no DNA	0	0
		Efficiency delta PilA5 : wt
		90.2307	%
		For figure
			Av.Efficiency (%)	st err mean
		wt	0.893336	0.0289988
		pilA4::kat	0	0
		pilA5::kat	0.806063	0.0308868
		no DNA	0	0
		Plus individual data points
			x-pos	Experiment 1	x-pos	Experiment 2	x-pos	Experiment 3	x-pos	Experiment 4
		1	0.91	0.905005	0.97	0.895129	1.03	0.956823	1.09	0.816387
		2	1.91	0	1.97	0	2.03	0	2.09	0
		3	2.91	0.833982	2.97	0.877582	3.03	0.773804	3.09	0.738885
		4	3.91	0	3.97	0	4.03	0	4.09	0

## Sheet: Sup Fig. 2a
	Supplementary Fig. 2a
	Protein Name	T: Fasta headers	LFQ Int 58_1	LFQ Int 58_2	LFQ Int 58_3	LFQ Int 58_4	AVERAGE 58	st err mean	LFQ Int 68_1	LFQ Int 68_2	LFQ Int 68_3	LFQ Int 68_4	AVERAGE 68	st err mean
	PilA4	>tr|Q72JC0|Q72JC0_THET2 PilA OS=Thermus thermophilus (strain HB27 / ATCC BAA-163 / DSM 7039) GN=pilA PE=4 SV=1	36926000000	71606000000	68044000000	32581000000	52289250000	1.0189e+10	9906600000	13964000000	18462000000	3405500000	11434525000	3.19614e+09
	TT_C1836	>tr|Q72GL2|Q72GL2_THET2 Uncharacterized protein OS=Thermus thermophilus (strain HB27 / ATCC BAA-163 / DSM 7039) GN=TT_C1836 PE=4 SV=1	8415600000	7713400000	5710700000	7089100000	7232200000	5.74995e+08	26565000000	16929000000	4629800000	808190000	12232997500	5.88638e+09
	TT_C1838	>tr|Q72GL0|Q72GL0_THET2 General secretion pathway protein G OS=Thermus thermophilus (strain HB27 / ATCC BAA-163 / DSM 7039) GN=TT_C1838 PE=4 SV=1	1269800000	1273300000	390640000	219630000	788342500	2.81156e+08	1657000000	860150000	150320000	22699000	672542250	3.76316e+08
	PilQ	>tr|Q72IW4|Q72IW4_THET2 Competence protein pilQ OS=Thermus thermophilus (strain HB27 / ATCC BAA-163 / DSM 7039) GN=pilQ PE=3 SV=1	575290000	655010000	824210000	440080000	623647500	8.02311e+07	449720000	387070000	287750000	175020000	324890000	6.0062e+07
	TT_C1651	>tr|Q72H44|Q72H44_THET2 Uncharacterized protein OS=Thermus thermophilus (strain HB27 / ATCC BAA-163 / DSM 7039) GN=TT_C1651 PE=4 SV=1	620650000	561570000	688970000	221170000	523090000	1.03951e+08	0	0	141030	0	35257.5	35257.5
	TT_C1842	>tr|Q72GK6|Q72GK6_THET2 Uncharacterized protein OS=Thermus thermophilus (strain HB27 / ATCC BAA-163 / DSM 7039) GN=TT_C1842 PE=4 SV=1	436710000	456410000	374670000	175870000	360915000	6.40931e+07	36013000	35611000	548210	0	1.80431e+07	1.02598e+07
	PilF	>tr|Q72H73|Q72H73_THET2 ATP-binding motif-containing protein pilF OS=Thermus thermophilus (strain HB27 / ATCC BAA-163 / DSM 7039) GN=pilF PE=4 SV=1	1148400000	44268000	52513000	82423000	331901000	2.7229e+08	135550000	39779000	43441000	77289000	74014750	2.21814e+07
	TT_P0076	>tr|Q746H9|Q746H9_THET2 Uncharacterized protein OS=Thermus thermophilus (strain HB27 / ATCC BAA-163 / DSM 7039) GN=TT_P0076 PE=4 SV=1	126010000	100080000	87932000	82005000	99006750	9.7555e+06	17679000	18701000	12733000	5264800	13594450	3.0671e+06
	TT_P0077	>tr|Q746H8|Q746H8_THET2 Uncharacterized protein OS=Thermus thermophilus (strain HB27 / ATCC BAA-163 / DSM 7039) GN=TT_P0077 PE=4 SV=1	83920000	67368000	39514000	68503000	64826250	9.24329e+06	10503000	14560000	11441000	3173200	9919300	2.41009e+06
	PilM	>tr|Q72IW8|Q72IW8_THET2 Pilus-associated protein pilM OS=Thermus thermophilus (strain HB27 / ATCC BAA-163 / DSM 7039) GN=pilM PE=1 SV=1	45452000	29416000	21615000	22161000	29661000	5.55581e+06	67293000	47556000	67072000	86744000	67166250	7.99935e+06
	PilT1	>tr|Q72H74|Q72H74_THET2 Pili retraction protein pilT OS=Thermus thermophilus (strain HB27 / ATCC BAA-163 / DSM 7039) GN=pilT PE=4 SV=1	14015000	15749000	20505000	50525000	25198500	8.5529e+06	45436000	37479000	76187000	216950000	94013000	4.18201e+07
	TT_C1839	>tr|Q72GK9|Q72GK9_THET2 General secretion pathway protein G OS=Thermus thermophilus (strain HB27 / ATCC BAA-163 / DSM 7039) GN=TT_C1839 PE=4 SV=1	14774000	22492000	18876000	17451000	18398250	1.60778e+06	218380000	175500000	28986000	8280500	107786625	5.23824e+07
	TT_C1841	>tr|Q72GK7|Q72GK7_THET2 Uncharacterized protein OS=Thermus thermophilus (strain HB27 / ATCC BAA-163 / DSM 7039) GN=TT_C1841 PE=4 SV=1	16164000	16527000	14284000	7895300	13717575	2.00203e+06	59379000	36787000	13049000	13259000	30618500	1.10877e+07
	PilW	>tr|Q72IW5|Q72IW5_THET2 Competence protein pilW OS=Thermus thermophilus (strain HB27 / ATCC BAA-163 / DSM 7039) GN=pilW PE=4 SV=1	3828600	10062000	13644000	26119000	13413400	4.69562e+06	16883000	27269000	60662000	89157000	48492750	1.64603e+07
	FimA	>tr|Q72HG7|Q72HG7_THET2 Major pilin protein fimA OS=Thermus thermophilus (strain HB27 / ATCC BAA-163 / DSM 7039) GN=fimA PE=4 SV=1	9994400	6974200	5413500	2912700	6323700	1.48213e+06	3020400	0	2841100	3551400	2353225	798772
	PilT2	>tr|Q72HS1|Q72HS1_THET2 Pili retraction protein pilT OS=Thermus thermophilus (strain HB27 / ATCC BAA-163 / DSM 7039) GN=pilT PE=4 SV=1	3929500	4380400	4976700	7333100	5154925	757065	16665000	11039000	16882000	36624000	20302500	5.60606e+06
	PilN	>tr|Q72IW7|Q72IW7_THET2 Competence protein pilN OS=Thermus thermophilus (strain HB27 / ATCC BAA-163 / DSM 7039) GN=pilN PE=1 SV=1	0	0	552700	4451200	1250975	1.07467e+06	0	0	4255900	9954200	3552525	2.35791e+06
	PilC	>tr|Q72KJ4|Q72KJ4_THET2 Pili assembly protein pilC OS=Thermus thermophilus (strain HB27 / ATCC BAA-163 / DSM 7039) GN=pilC PE=3 SV=1	0	0	0	0	0	0	1261900	0	1896900	6291300	2362525	1.36763e+06
	PilO	>tr|Q72IW6|Q72IW6_THET2 Competence protein pilO OS=Thermus thermophilus (strain HB27 / ATCC BAA-163 / DSM 7039) GN=pilO PE=4 SV=1	0	0	0	0	0	0	0	0	0	213660	53415	53415
	data points
	x base	center 58
	shift center	0.14	shift point	0.05	x	LFQ Int 58_1	x	LFQ Int 58_2	x	LFQ Int 58_3
	1	0.86			0.785	36926000000	0.835	71606000000	0.885	68044000000
	2	1.86			1.785	8415600000	1.835	7713400000	1.885	5710700000
	3	2.86			2.785	1269800000	2.835	1273300000	2.885	390640000
	4	3.86			3.785	575290000	3.835	655010000	3.885	824210000
	5	4.86			4.785	620650000	4.835	561570000	4.885	688970000
	6	5.86			5.785	436710000	5.835	456410000	5.885	374670000
	7	6.86			6.785	1148400000	6.835	44268000	6.885	52513000
	8	7.86			7.785	126010000	7.835	100080000	7.885	87932000
	9	8.86			8.785	83920000	8.835	67368000	8.885	39514000
	10	9.86			9.785	45452000	9.835	29416000	9.885	21615000
	11	10.86			10.785	14015000	10.835	15749000	10.885	20505000
	12	11.86			11.785	14774000	11.835	22492000	11.885	18876000
	13	12.86			12.785	16164000	12.835	16527000	12.885	14284000
	14	13.86			13.785	3828600	13.835	10062000	13.885	13644000
	15	14.86			14.785	9994400	14.835	6974200	14.885	5413500
	16	15.86			15.785	3929500	15.835	4380400	15.885	4976700
	17	16.86			16.785	0	16.835	0	16.885	552700
	18	17.86			17.785	0	17.835	0	17.885	0
	19	18.86			18.785	0	18.835	0	18.885	0
											x	LFQ Int 58_4		x	data points 58	x	data points 68
											0.935	32581000000		0.785	36926000000	1.065	9906600000
											1.935	7089100000		1.785	8415600000	2.065	26565000000
											2.935	219630000		2.785	1269800000	3.065	1657000000
											3.935	440080000		3.785	575290000	4.065	449720000
											4.935	221170000		4.785	620650000	5.065	0
		center 68									5.935	175870000		5.785	436710000	6.065	36013000
	shift center	0.14	shift point	0.05	x	LFQ Int 68_1	x	LFQ Int 68_2	x	LFQ Int 68_3	6.935	82423000		6.785	1148400000	7.065	135550000
		1.14			1.065	9906600000	1.115	13964000000	1.165	18462000000	7.935	82005000		7.785	126010000	8.065	17679000
		2.14			2.065	26565000000	2.115	16929000000	2.165	4629800000	8.935	68503000		8.785	83920000	9.065	10503000
		3.14			3.065	1657000000	3.115	860150000	3.165	150320000	9.935	22161000		9.785	45452000	10.065	67293000
		4.14			4.065	449720000	4.115	387070000	4.165	287750000	10.935	50525000		10.785	14015000	11.065	45436000
		5.14			5.065	0	5.115	0	5.165	141030	11.935	17451000		11.785	14774000	12.065	218380000
		6.14			6.065	36013000	6.115	35611000	6.165	548210	12.935	7895300		12.785	16164000	13.065	59379000
		7.14			7.065	135550000	7.115	39779000	7.165	43441000	13.935	26119000		13.785	3828600	14.065	16883000
		8.14			8.065	17679000	8.115	18701000	8.165	12733000	14.935	2912700		14.785	9994400	15.065	3020400
		9.14			9.065	10503000	9.115	14560000	9.165	11441000	15.935	7333100		15.785	3929500	16.065	16665000
		10.14			10.065	67293000	10.115	47556000	10.165	67072000	16.935	4451200		16.785	0	17.065	0
		11.14			11.065	45436000	11.115	37479000	11.165	76187000	17.935	0		17.785	0	18.065	1261900
		12.14			12.065	218380000	12.115	175500000	12.165	28986000	18.935	0		18.785	0	19.065	0
		13.14			13.065	59379000	13.115	36787000	13.165	13049000				0.835	71606000000	1.115	13964000000
		14.14			14.065	16883000	14.115	27269000	14.165	60662000				1.835	7713400000	2.115	16929000000
		15.14			15.065	3020400	15.115	0	15.165	2841100				2.835	1273300000	3.115	860150000
		16.14			16.065	16665000	16.115	11039000	16.165	16882000				3.835	655010000	4.115	387070000
		17.14			17.065	0	17.115	0	17.165	4255900				4.835	561570000	5.115	0
		18.14			18.065	1261900	18.115	0	18.165	1896900				5.835	456410000	6.115	35611000
		19.14			19.065	0	19.115	0	19.165	0				6.835	44268000	7.115	39779000
											x	LFQ Int 68_4		7.835	100080000	8.115	18701000
											1.215	3405500000		8.835	67368000	9.115	14560000
											2.215	808190000		9.835	29416000	10.115	47556000
											3.215	22699000		10.835	15749000	11.115	37479000
											4.215	175020000		11.835	22492000	12.115	175500000
											5.215	0		12.835	16527000	13.115	36787000
											6.215	0		13.835	10062000	14.115	27269000
											7.215	77289000		14.835	6974200	15.115	0
											8.215	5264800		15.835	4380400	16.115	11039000
											9.215	3173200		16.835	0	17.115	0
											10.215	86744000		17.835	0	18.115	0
											11.215	216950000		18.835	0	19.115	0
											12.215	8280500		0.885	68044000000	1.165	18462000000
											13.215	13259000		1.885	5710700000	2.165	4629800000
											14.215	89157000		2.885	390640000	3.165	150320000
											15.215	3551400		3.885	824210000	4.165	287750000
											16.215	36624000		4.885	688970000	5.165	141030
											17.215	9954200		5.885	374670000	6.165	548210
											18.215	6291300		6.885	52513000	7.165	43441000
											19.215	213660		7.885	87932000	8.165	12733000
														8.885	39514000	9.165	11441000
														9.885	21615000	10.165	67072000
														10.885	20505000	11.165	76187000
														11.885	18876000	12.165	28986000
														12.885	14284000	13.165	13049000
														13.885	13644000	14.165	60662000
														14.885	5413500	15.165	2841100
														15.885	4976700	16.165	16882000
														16.885	552700	17.165	4255900
														17.885	0	18.165	1896900
														18.885	0	19.165	0
														0.935	32581000000	1.215	3405500000
														1.935	7089100000	2.215	808190000
														2.935	219630000	3.215	22699000
														3.935	440080000	4.215	175020000
														4.935	221170000	5.215	0
														5.935	175870000	6.215	0
														6.935	82423000	7.215	77289000
														7.935	82005000	8.215	5264800
														8.935	68503000	9.215	3173200
														9.935	22161000	10.215	86744000
														10.935	50525000	11.215	216950000
														11.935	17451000	12.215	8280500
														12.935	7895300	13.215	13259000
														13.935	26119000	14.215	89157000
														14.935	2912700	15.215	3551400
														15.935	7333100	16.215	36624000
														16.935	4451200	17.215	9954200
														17.935	0	18.215	6291300
														18.935	0	19.215	213660

## Sheet: Sup Fig. 2b
	Supplementary Fig. 2b
		Lanes 1-3 and 7 used in final figure

## Sheet: Sup Fig. 3b
	Supplementary Fig. 3b
	relion: 8 classes, 35 it										plate: 48 h
			wt55exp-0	wt55exp-1	wt55exp-2		wt55stat-0	wt55stat-1	wt55stat-2		wt55plate-0	wt55plate-1	wt55plate-2
	no Pili		255	621	493		262	592	326		321	159	158
	no cell poles		24	40	33		40	40	41		40	59	44
	Pili/cell pole		10.625	15.525	14.9394		6.55	14.8	7.95122		8.025	2.69492	3.59091
	Pili/cell		21.25	31.05	29.8788		13.1	29.6	15.9024		16.05	5.38983	7.18182
	classes wide		1-3	1,2,3	1,2,3		1-5,8	1,2,3,6	1,3,5		1,3	3,4,7	1,2
	classes narrow		5-7	4,5,6	4,6		7	4,5,7	2,4		2,4-6,8	1,2,5	3,4
	classes uncertain		4,8	7,8	5,7,8		6	n.a.	6		7	6,8	5,6
	(classes sorted by number of particles)
	particles wide		2295	3953	3148		3927	5280	2476		1938	885	1092
	particles narrow		1385	2950	1591		413	2627	1511		2897	1170	585
	particles uncertain		764	1399	1632		481	0	2		339	237	357
	particles sum		4444	8302	6371		4821	7907	3989		5174	2292	2034
	extracted		4444	8302	6371		4821	7907	3989		5174	2292	2034
	%wide		51.6427	47.615	49.4114		81.4561	66.7763	62.0707		37.4565	38.6126	53.6873
	%narrow		31.1656	35.5336	24.9725		8.56669	33.2237	37.8792		55.9915	51.0471	28.7611
	%uncertain		17.1917	16.8514	25.6161		9.97718	0	0.0501379		6.55199	10.3403	17.5516
	no wide		10.9741	14.7845	14.7635		10.6708	19.7658	9.87075		6.01177	2.08115	3.85573
	no narrow		6.62269	11.0332	7.46149		1.12224	9.83422	6.02371		8.98664	2.75135	2.06557
	no unassigned		3.65324	5.23235	7.65377		1.30701	0	0.00797315		1.05159	0.557325	1.26053
											plate: 48 h
			wt68exp-0	wt68exp-1	wt68exp-2		wt68stat-0	wt68stat-1	wt68stat-2		wt68plate-0	wt68plate-1	wt68plate-2
	no Pili		324	368	270		135	94	54		66	41	65
	no cell poles		48	40	40		104	50	68		85	70	82
	Pili/cell pole		6.75	9.2	6.75		1.29808	1.88	0.794118		0.776471	0.585714	0.792683
	Pili/cell		13.5	18.4	13.5		2.59615	3.76	1.58824		1.55294	1.17143	1.58537
	classes wide		3.4	1,2,5,8	1,4,6		1-5	1,3,4	1		3	2,3	1
	classes narrow		1,2,5	4,6	2,5		6	2,5	2		1-2	1	2
	classes uncertain		6,7	3,7	3,7,8		n.a.	n.a.	n.a.		n.a.	n.a.	n.a.
	(classes sorted by number of particles)
	particles wide		1887	2842	1796		2353	831	372		341	300	580
	particles narrow		3150	1144	1069		184	446	338		833	269	354
	particles uncertain		396	1088	812		0	0	0		0	0	0
	particles sum		5433	5074	3677		2537	1277	710		1174	569	934
	extracted		5433	5074	3677		2537	1277	710		1174	569	934
	%wide		34.7322	56.011	48.8442		92.7473	65.0744	52.3944		29.046	52.7241	62.0985
	%narrow		57.979	22.5463	29.0726		7.25266	34.9256	47.6056		70.954	47.2759	37.9015
	%uncertain		7.28879	21.4426	22.0832		0	0	0		0	0	0
	no wide		4.68885	10.306	6.59396		2.40786	2.4468	0.832146		0.451067	0.617625	0.984488
	no narrow		7.82717	4.14852	3.9248		0.18829	1.3132	0.756089		1.10187	0.553804	0.600877
	no unassigned		0.983987	3.94545	2.98123		0	0	0		0	0	0
		Pili per cell
			wt 55 °C liquid expphase	wt 55 °C liquid stat phase	wt 55 °C plate	wt 68 °C liquid exp phase	wt 68 °C liquid stat phase	wt 68 °C plate
		wide	13.5074	13.4358	3.98288	7.19628	1.8956	0.684394
		narrow	8.37246	5.66006	4.60119	5.30016	0.752528	0.752185
		unassigned	5.51312	0.438328	0.956482	2.63689	0	0
		error wide	1.26666	3.17342	1.13645	1.64927	0.531847	0.157563
		error narrow	1.35222	2.5215	2.20164	1.26515	0.324739	0.175372
		error unassigned	1.16336	0.434348	0.208493	0.872065	0	0
		Data points
		shift	x-coordinate	wt 55 exp	x-coordinate	wt 55 stat	x-coordinate	wt 55 plate	x-coordinate	wt 68 exp	x-coordinate	wt 68 stat	x-coordinate	wt 68 plate
	no wide Experiment1	0.04	0.767	10.9741	1.766	10.6708	2.767	6.01177	3.767	4.68885	4.767	2.40786	5.767	0.451067
	no narrow Experiment1		0.961	6.62269	1.96	1.12224	2.961	8.98664	3.961	7.82717	4.961	0.18829	5.96	1.10187
	no unassigned Experiment1		1.153	3.65324	2.152	1.30701	3.153	1.05159	4.153	0.983987	5.153	0	6.153	0
	no wide Experiment2		0.807	14.7845	1.806	19.7658	2.807	2.08115	3.807	10.306	4.807	2.4468	5.807	0.617625
	no narrow Experiment2		1.001	11.0332	2	9.83422	3.001	2.75135	4.001	4.14852	5.001	1.3132	6	0.553804
	no unassigned Experiment2		1.193	5.23235	2.192	0	3.193	0.557325	4.193	3.94545	5.193	0	6.193	0
	no wide Experiment3		0.847	14.7635	1.846	9.87075	2.847	3.85573	3.847	6.59396	4.847	0.832146	5.847	0.984488
	no narrow Experiment3		1.041	7.46149	2.04	6.02371	3.041	2.06557	4.041	3.9248	5.041	0.756089	6.04	0.600877
	no unassigned Experiment3		1.233	7.65377	2.232	0.00797315	3.233	1.26053	4.233	2.98123	5.233	0	6.233	0

## Sheet: Sup Fig. 3c
	Supplementary Fig. 3c
	relion: 8 classes, 35 it
			wt55exp-0	wt55exp-1	wt55exp-2		PilA4_55exp-0	PilA4_55exp-1	PilA4_55exp-2		TTC1836_exp55-0	TTC1836_exp55-1	TTC1836_exp55-2
	no Pili		255	621	493		0	0	0		217	445	188
	no cell poles		24	40	33		60	38	40		56	40	40
	Pili/cell pole		10.625	15.525	14.9394		0	0	0		3.875	11.125	4.7
	Pili/cell		21.25	31.05	29.8788		0	0	0		7.75	22.25	9.4
	classes wide		1-3	1,2,3	1,2,3		n.a	n.a	n.a		1,2,3,4,6	1-6	1,2
	classes narrow		5-7	4,5,6	4,6		n.a.	n.a.	n.a.		n.a.	n.a.	n.a.
	classes uncertain		4,8	7,8	5,7,8		n.a.	n.a.	n.a.		5,7	7	3
	(classes sorted by number of particles)
	particles wide		2295	3953	3148		0	0	0		2902	4641	1863
	particles narrow		1385	2950	1591		0	0	0		0	0	0
	particles uncertain		764	1399	1632		0	0	0		502	252	206
	particles sum		4444	8302	6371		0	0	0		3404	4893	2069
	extracted		4444	8302	6371		0	0	0		3404	4893	2069
	%wide		51.6427	47.615	49.4114		0	0	0		85.2526	94.8498	90.0435
	%narrow		31.1656	35.5336	24.9725		0	0	0		0	0	0
	%uncertain		17.1917	16.8514	25.6161		0	0	0		14.7474	5.15021	9.9565
	no wide		10.9741	14.7845	14.7635		0	0	0		6.60708	21.1041	8.46409
	no narrow		6.62269	11.0332	7.46149		0	0	0		0	0	0
	no unassigned		3.65324	5.23235	7.65377		0	0	0		1.14292	1.14592	0.935911
			wt68exp-0	wt68exp-1	wt68exp-2		PilA4_68exp-0	PilA4_68exp-1	PilA4_68exp-2		TTC1836_exp68-0	TTC1836_exp68-1	TTC1836_exp68-2
	no Pili		324	368	270		0	0	0		96	145	140
	no cell poles		48	40	40		42	42	7		39	40	42
	Pili/cell pole		6.75	9.2	6.75		0	0	0		2.46154	3.625	3.33333
	Pili/cell		13.5	18.4	13.5		0	0	0		4.92308	7.25	6.66667
	classes wide		3.4	1,2,5,8	1,4,6		n.a	n.a	n.a		1,2,3	1,2,3	1,2
	classes narrow		1,2,5	4,6	2,5		n.a.	n.a.	n.a.		n.a.	n.a.	n.a.
	classes uncertain		6,7	3,7	3,7,8		n.a.	n.a.	n.a.		4	4	n.a.
	(classes sorted by number of particles)
	particles wide		1887	2842	1796		0	0	0		1492	1914	1619
	particles narrow		3150	1144	1069		0	0	0		0	0	0
	particles uncertain		396	1088	812		0	0	0		3	14	0
	particles sum		5433	5074	3677		0	0	0		1495	1928	1619
	extracted		5433	5074	3677		0	0	0		1495	1928	1619
	%wide		34.7322	56.011	48.8442		0	0	0		99.7993	99.2739	100
	%narrow		57.979	22.5463	29.0726		0	0	0		0	0	0
	%uncertain		7.28879	21.4426	22.0832		0	0	0		0.200669	0.726141	0
	no wide		4.68885	10.306	6.59396		0	0	0		4.9132	7.19735	6.66667
	no narrow		7.82717	4.14852	3.9248		0	0	0		0	0	0
	no unassigned		0.983987	3.94545	2.98123		0	0	0		0.00987908	0.0526452	0
		Pili per cell
			wt 55 °C	PilA4::kat 55 °C	TT_C1838::kat 55 °C	wt 68 °C	PilA4::kat 68 °C	TT_C1838::kat 68 °C
		wide	13.5074	0	12.0584	7.19628	0	6.25907
		narrow	8.37246	0	0	5.30016	0	0
		unassigned	5.51312	0	1.07492	2.63689	0	0.0208414
		error wide	1.26666	0	4.55449	1.64927	0	0.690155
		error narrow	1.35222	0	0	1.26515	0	0
		error unassigned	1.16336	0	0.0695089	0.872065	0	0.0161556
		Data points
		shift	x-coordinate	wt 55 exp	x-coordinate	PilA4 55 exp	x-coordinate	1836 55 exp	x-coordinate	wt 68 exp	x-coordinate	PilA4 68 exp	x-coordinate	1836 68 exp
	no wide Experiment1	0.04	0.767	10.9741	1.766	0	2.767	6.60708	3.767	4.68885	4.767	0	5.767	4.9132
	no narrow Experiment1		0.961	6.62269	1.96	0	2.961	0	3.961	7.82717	4.961	0	5.96	0
	no unassigned Experiment1		1.153	3.65324	2.152	0	3.153	1.14292	4.153	0.983987	5.153	0	6.153	0.00987908
	no wide Experiment2		0.807	14.7845	1.806	0	2.807	21.1041	3.807	10.306	4.807	0	5.807	7.19735
	no narrow Experiment2		1.001	11.0332	2	0	3.001	0	4.001	4.14852	5.001	0	6	0
	no unassigned Experiment2		1.193	5.23235	2.192	0	3.193	1.14592	4.193	3.94545	5.193	0	6.193	0.0526452
	no wide Experiment3		0.847	14.7635	1.846	0	2.847	8.46409	3.847	6.59396	4.847	0	5.847	6.66667
	no narrow Experiment3		1.041	7.46149	2.04	0	3.041	0	4.041	3.9248	5.041	0	6.04	0
	no unassigned Experiment3		1.233	7.65377	2.232	0	3.233	0.935911	4.233	2.98123	5.233	0	6.233	0

## Sheet: Sup Fig. 4a,b
	Supplementary Fig. 4a
	Supplementary Fig. 4b

## Sheet: Sup Fig. 4c
	Supplementary Fig. 4c
										raw image marker						raw image antibody							lanes on the left were used for final figure
																PilQ antibodies are described in Rumszauer et al. (2006)
																doi:10.1111/j.1742-4658.2006.05335.x

[truncated: 4 more sheets: Sup Fig. 5e, Sup Fig. 6g, Sup Fig. 6h, Sup Table 4]
